# Supplementary material for: Dynamic Analysis of Physicochemical Properties and Polysaccharide Composition during the Pile-Fermentation of Post-Fermented Tea
Source: MDPI journal article supplement (doi:10.3390/foods11213376), 2022-10-26
Supplement: s1 [file s1]

**Supplementary Table S1** Content of physical and chemical components during the pile-fermentation of post-fermented tea ( $n=3$ , %).

| Samples            | W-0                     | W-1                     | W-2                     | W-3                     | W-4                     | W-5                     | W-6                     | W-7                     | C-1                     |
|--------------------|-------------------------|-------------------------|-------------------------|-------------------------|-------------------------|-------------------------|-------------------------|-------------------------|-------------------------|
| Tea polyphenols    | 10.83±0.34 <sup>a</sup> | 10.37±0.65 <sup>a</sup> | 8.44±0.50 <sup>b</sup>  | 7.62±0.44 <sup>c</sup>  | 6.59±0.72 <sup>d</sup>  | 4.44±0.24 <sup>f</sup>  | 4.78±0.37 <sup>f</sup>  | 5.21±0.20 <sup>e</sup>  | 4.63±0.31 <sup>f</sup>  |
| Catechin           | 7.24±0.08 <sup>a</sup>  | 6.27±0.02 <sup>b</sup>  | 5.94±0.09 <sup>c</sup>  | 5.03±0.12 <sup>c</sup>  | 3.08±0.02 <sup>d</sup>  | 3.00±0.36 <sup>d</sup>  | 3.12±0.45 <sup>d</sup>  | 3.40±0.26 <sup>d</sup>  | 3.20±0.62 <sup>d</sup>  |
| Flavone            | 3.10±0.11 <sup>a</sup>  | 2.86±0.09 <sup>a</sup>  | 1.90±0.08 <sup>c</sup>  | 2.47±0.10 <sup>b</sup>  | 1.42±0.06 <sup>c</sup>  | 1.75±0.07 <sup>c</sup>  | 1.68±0.07 <sup>c</sup>  | 2.13±0.09 <sup>b</sup>  | 2.02±0.08 <sup>c</sup>  |
| Theabrownine       | 4.23±0.33 <sup>d</sup>  | 5.29±0.33 <sup>c</sup>  | 5.75±0.29 <sup>c</sup>  | 5.87±0.33 <sup>c</sup>  | 6.81±0.57 <sup>b</sup>  | 6.92±0.60 <sup>b</sup>  | 6.57±0.33 <sup>b</sup>  | 6.69±0.60 <sup>b</sup>  | 9.62±0.29 <sup>a</sup>  |
| Amino acid         | 1.59±0.02 <sup>a</sup>  | 1.34±0.04 <sup>b</sup>  | 1.26±0.06 <sup>b</sup>  | 1.52±0.01 <sup>a</sup>  | 1.22±0.07 <sup>b</sup>  | 1.15±0.21 <sup>b</sup>  | 1.18±0.13 <sup>b</sup>  | 1.07±0.04 <sup>b</sup>  | 0.87±0.04 <sup>c</sup>  |
| Caffeine           | 1.30±0.04 <sup>b</sup>  | 1.33±0.00 <sup>b</sup>  | 1.34±0.00 <sup>b</sup>  | 1.45±0.03 <sup>b</sup>  | 1.42±0.02 <sup>b</sup>  | 1.58±0.01 <sup>b</sup>  | 1.82±0.00 <sup>a</sup>  | 1.38±0.00 <sup>b</sup>  | 1.56±0.03 <sup>b</sup>  |
| Soluble sugar      | 3.73±0.04 <sup>d</sup>  | 4.46±0.07 <sup>c</sup>  | 5.02±0.05 <sup>b</sup>  | 3.62±0.04 <sup>d</sup>  | 7.02±0.07 <sup>a</sup>  | 4.05±0.04 <sup>c</sup>  | 5.05±0.03 <sup>b</sup>  | 4.85±0.04 <sup>c</sup>  | 4.65±0.03 <sup>c</sup>  |
| Tea polysaccharide | 3.13±0.14 <sup>g</sup>  | 5.62±0.08 <sup>f</sup>  | 12.17±0.06 <sup>e</sup> | 16.53±0.08 <sup>c</sup> | 17.11±0.09 <sup>b</sup> | 18.26±0.07 <sup>a</sup> | 16.51±0.10 <sup>c</sup> | 15.56±0.06 <sup>d</sup> | 15.42±0.03 <sup>d</sup> |
| Total protein      | 9.98±0.09 <sup>a</sup>  | 9.76±0.02 <sup>a</sup>  | 9.38±0.10 <sup>a</sup>  | 9.39±0.04 <sup>b</sup>  | 9.01±0.08 <sup>b</sup>  | 8.86±0.03 <sup>b</sup>  | 8.84±0.04 <sup>b</sup>  | 8.97±0.06 <sup>b</sup>  | 9.04±0.11 <sup>b</sup>  |
